# Supplementary material for: Racial and Ethnic Inequities in Inpatient Psychiatric Civil Commitment
Source: Atypon-hosted journal article supplement (doi:10.1176/appi.ps.202100342), 2022-08-12
Supplement: appi.ps.202100342.ds001.pdf [file appi.ps.202100342.ds001.pdf]

**Supplemental flow diagram.** Legal Pathways from Admission to Discharge (DC) within the Cohort

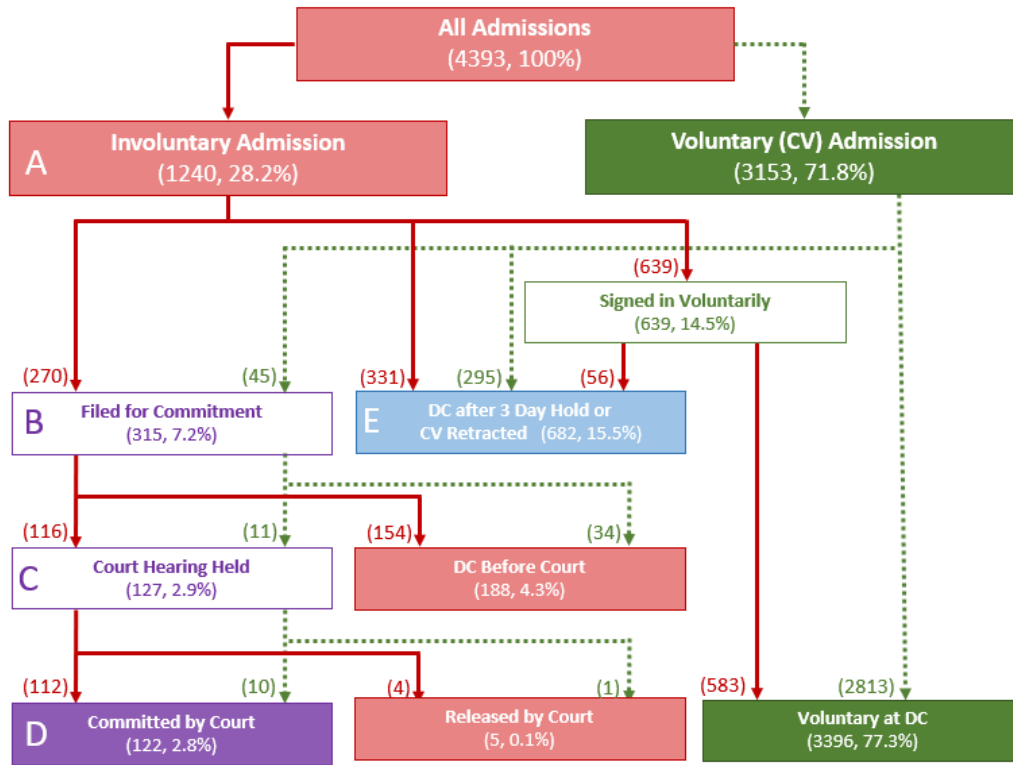

*CV = Conditional Voluntary, DC = Discharge*

**Supplemental Table:** Trends in Involuntary Admission by Race/Ethnicity over time

|      | % of patients in each racial group admitted Involuntarily |       |                 |       |       |
|------|-----------------------------------------------------------|-------|-----------------|-------|-------|
|      | White                                                     | Black | Latinx/Hispanic | Asian | Other |
| 2012 | 20.8                                                      | 46.9  | 33.3            | 21.4  | 28.6  |
| 2013 | 16.5                                                      | 37.7  | 17              | 31.8  | 33.3  |
| 2014 | 20.7                                                      | 38.9  | 35.1            | 38.1  | 43.8  |
| 2015 | 24.6                                                      | 35    | 37.9            | 50    | 52.6  |
| 2016 | 25.1                                                      | 46.8  | 31.3            | 35.7  | 50    |
| 2017 | 33.1                                                      | 61.8  | 38.9            | 60    | 40    |
| 2018 | 27                                                        | 46.3  | 46.3            | 25.8  | 45    |
